# Supplementary material
Source: PubMed Central journal article supplement (PMC3065498)
Supplement: NIHMS46540-supplement-supplement_1.pdf [file NIHMS46540-supplement-supplement_1.pdf]

## Supplementary Information for:

### A FORWARD CHEMICAL GENETIC SCREEN REVEALS AN INHIBITOR OF THE MRE11-RAD50-NBS1 COMPLEX

Aude Dupré<sup>1#%</sup>, Louise Boyer-Chatenet<sup>1#&</sup>, Rose M. Sattler<sup>1</sup>, Ami P. Modi<sup>1</sup>, Ji-Hoon Lee<sup>2</sup>,  
Matthew L. Nicolette<sup>2</sup>, Levy Kopelovich<sup>3</sup>, Maria Jasin<sup>4</sup>, Richard Baer<sup>1</sup>, Tanya T. Paull<sup>2</sup>  
and Jean Gautier<sup>1\*</sup>

# These authors contributed equally to this work.

<sup>1</sup> Columbia University, Institute for Cancer Genetics, Irving Cancer Research Center,  
1130 St Nicholas Avenue, Room 602, New York, NY 10032

<sup>2</sup> Department of Molecular Genetics and Microbiology, and the Institute of Cellular and  
Molecular Biology, University of Texas, Austin, TX 78712 USA

<sup>3</sup> Division of Cancer Prevention, NCI, Bethesda, MD, USA

<sup>4</sup> Developmental Biology Program, Memorial Sloan-Kettering Cancer Center, New York,  
NY 10021, USA

& Present address: Service de cardiologie, 184, rue du Faubourg Saint-Antoine, 75571  
Paris Cedex 12, France

% Present address: CNRS-UMR 7622, case 24, 4 place Jussieu 75005 Paris, France

\*Corresponding author: Jean Gautier

Phone: 212-851-4564

email: [jg130@columbia.edu](mailto:jg130@columbia.edu)

**Supplementary Figure 1.** Screening protocol. *Xenopus* extracts were treated with DSB-containing DNA ( $5 \text{ ng } \mu\text{l}^{-1}$ ). Aliquots of extracts were then transferred to 96-well plates containing 80 compounds (columns 2-11) per plate. Positions A1, A12, B1, B12, C1 and C12 were used for positive controls (PC; no compound). Caffeine, an ATM inhibitor, was used as a control for inhibition in positions D1, D12, E1 and E12. Positions F1, F12, G1, G12, H1 and H12 were used as negative controls (NC) with non-phosphorylatable peptide (AVGKKAQAAQEY). The activity of ATM was assayed by measuring the incorporation of radio-labeled  $\gamma^{32}\text{P}$ -ATP into a peptide derived from Histone H2AX (AVGKKASQASQEY). The reactions were transferred to a 96-well P81 phosphocellulose plate, washed, dried and exposed to a PhosphorImager screen.

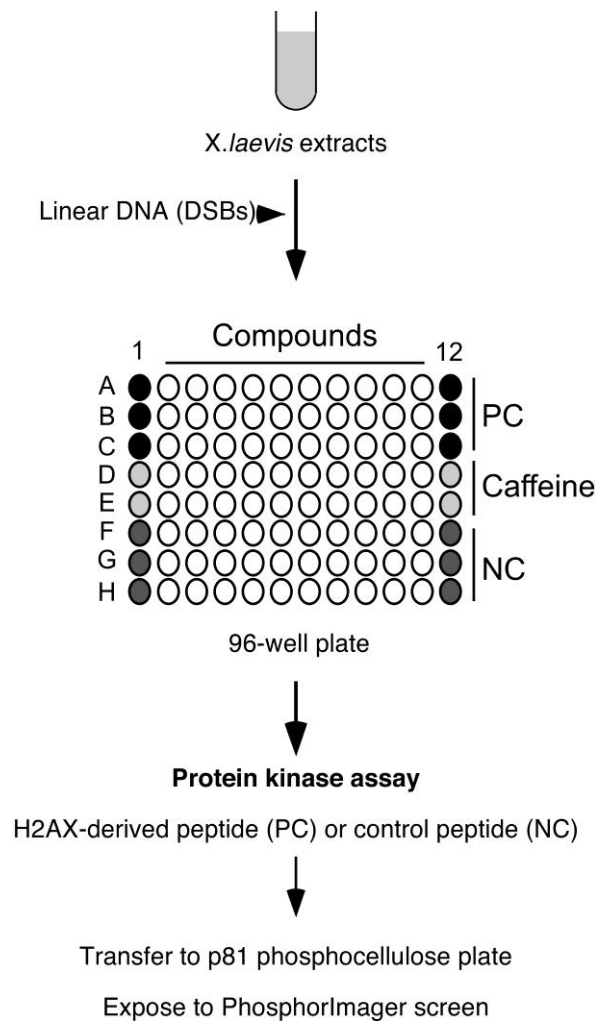

**Supplementary Figure 2.** Z' factor calculated for the H2AX peptide phosphorylation assay screen (125 plates).

Z' factor is used for determining validity of an assay, and Z' factor scores between 0.5 and 1 indicate an excellent screening assay. The Z' factor for each plate was calculated based on the following formula:  $1 - ((\text{standard deviation positive sample values} + \text{standard deviation negative sample values}) / (\text{average of positive sample values} - \text{average negative sample values}))$ .

Open squares indicate Z' values below 0.2. Data from these plates were eliminated and these plates were not considered in the calculation of the average Z' factor for the screening assay.

The average for Z' factor for 121 plates in our screen was 0.57, indicating that the assay is highly robust. Mirin was identified from plate number 68, with a Z' factor of 0.87.

Z' values

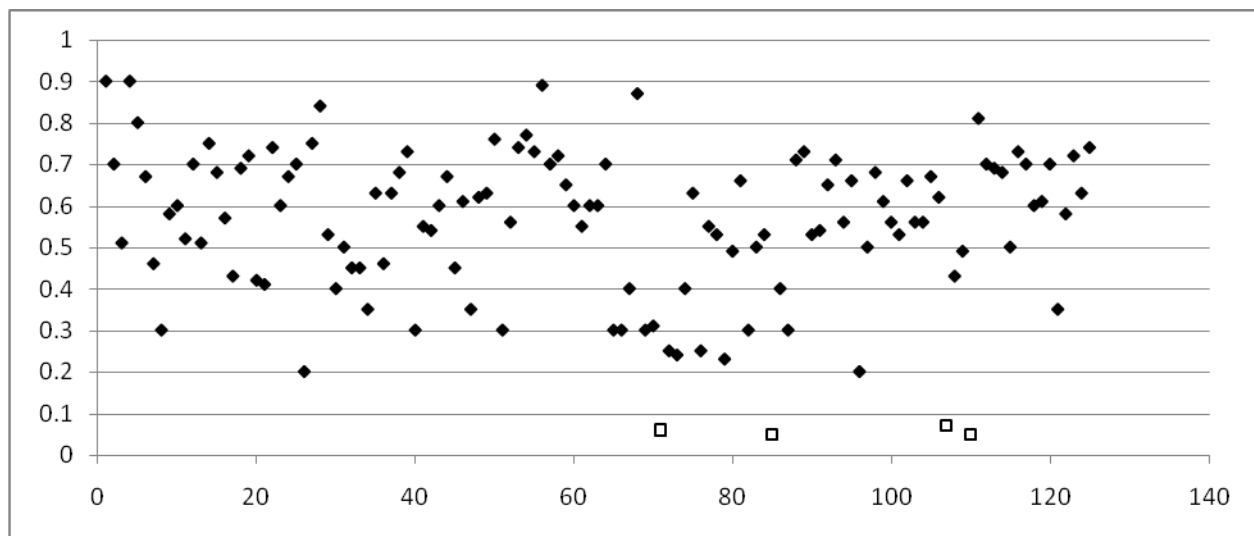

Plate number

# Supplementary Figure 3. Purity of Mirin by NMR

(a)  $^{13}\text{C}$  NMR

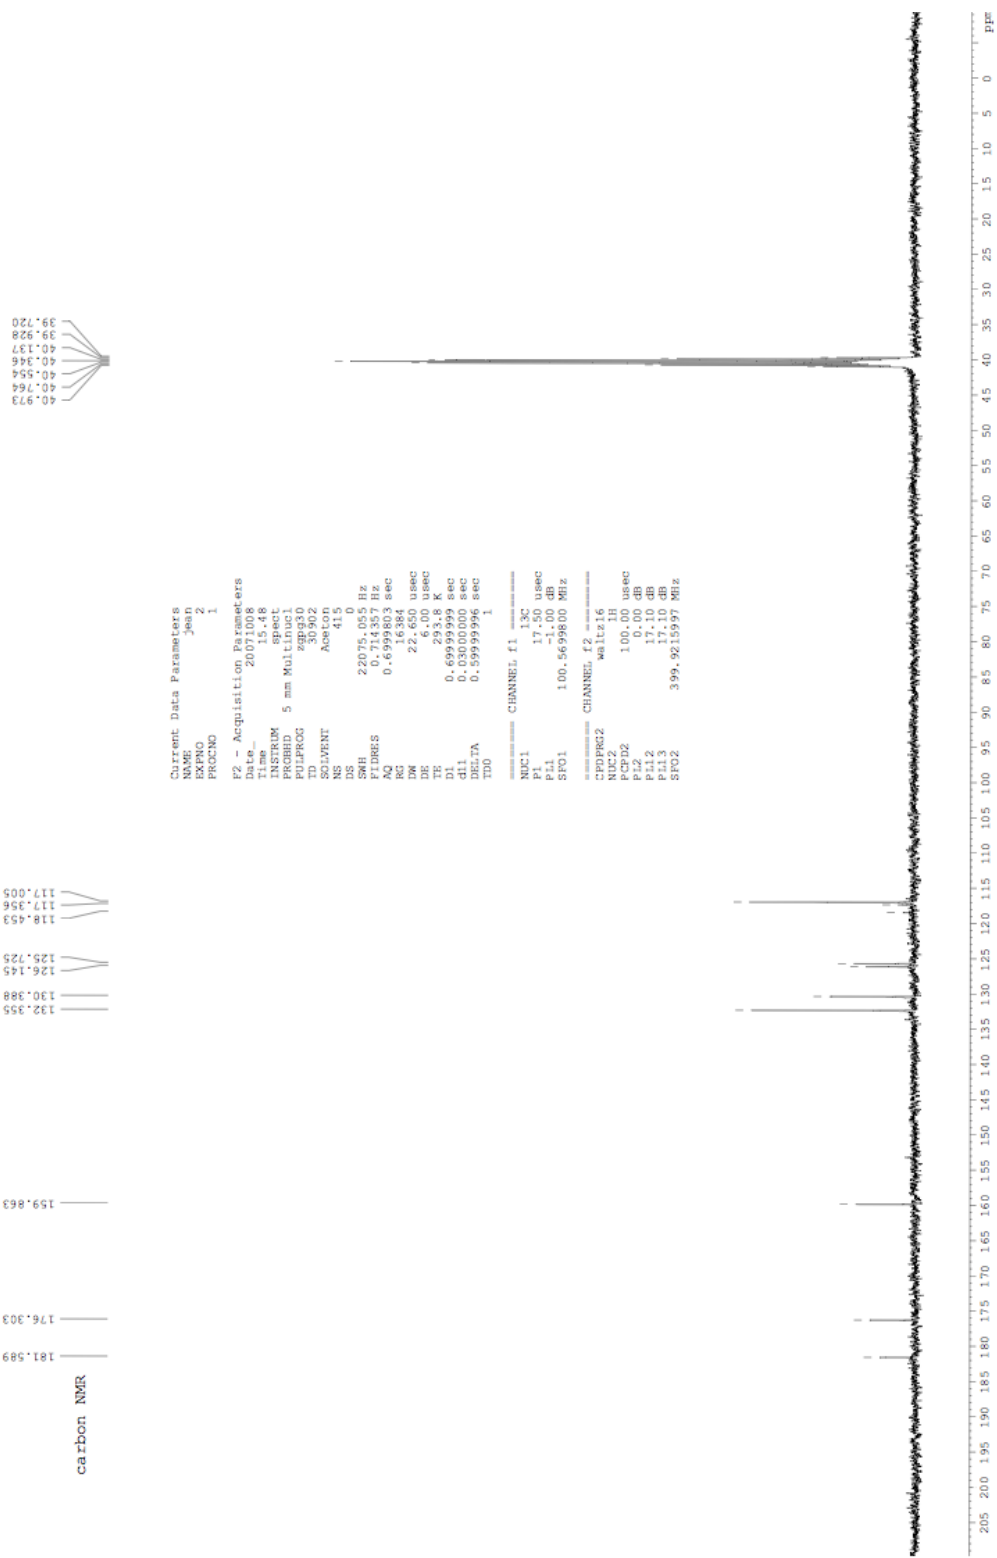

(b) <sup>1</sup>H NMR

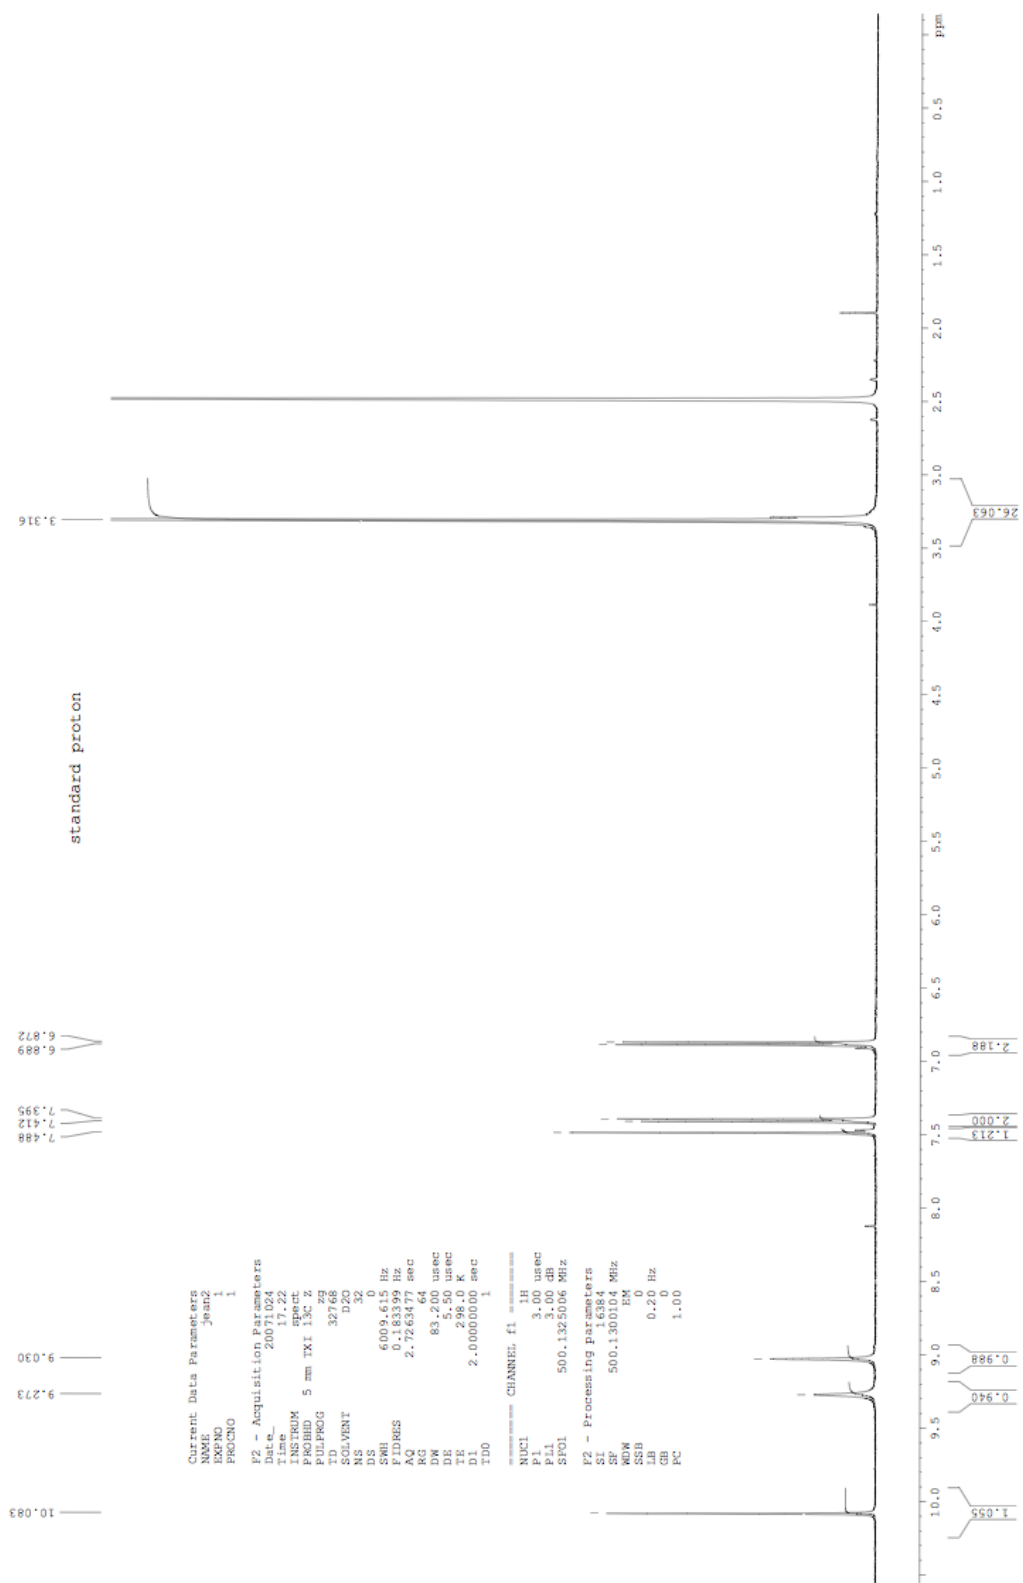

**Supplementary Figure 4.** Titration curve of Mirin inhibition of dimeric ATM activation.

Dimeric recombinant ATM was incubated at the indicated concentrations of Mirin in presence of DNA and MRN. Activation of ATM was then monitored using phosphorylation of p53 on serine 15 as a read-out. ATM activation was inhibited by Mirin with an  $IC_{50}$  of 12  $\mu$ M.

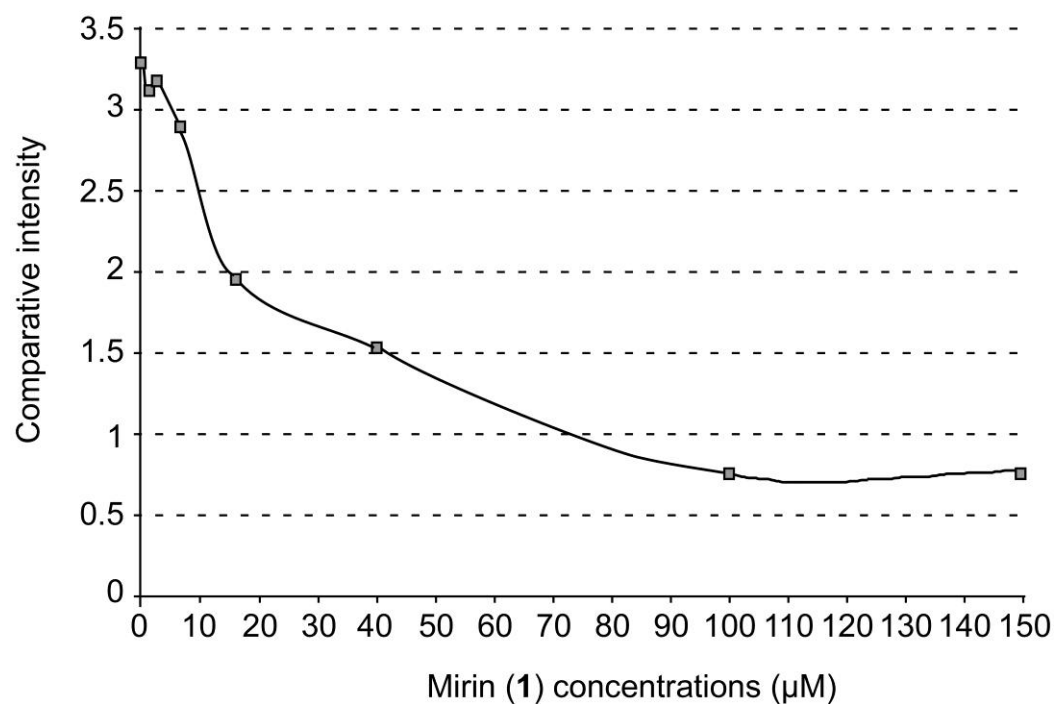

**Supplementary Figure 5.** Rad50-associated adenylate kinase (AK) is not inhibited by Mirin.

Adenylate kinase assays were performed with human MR (~300 nM),  $\gamma^{32}\text{P}$ -ATP (50  $\mu\text{M}$ ) and AMP (50  $\mu\text{M}$ ). The reaction products were separated by TLC. Positions of the  $\text{P}_i$  product of ATPase activity and ADP product of AK activity are indicated.

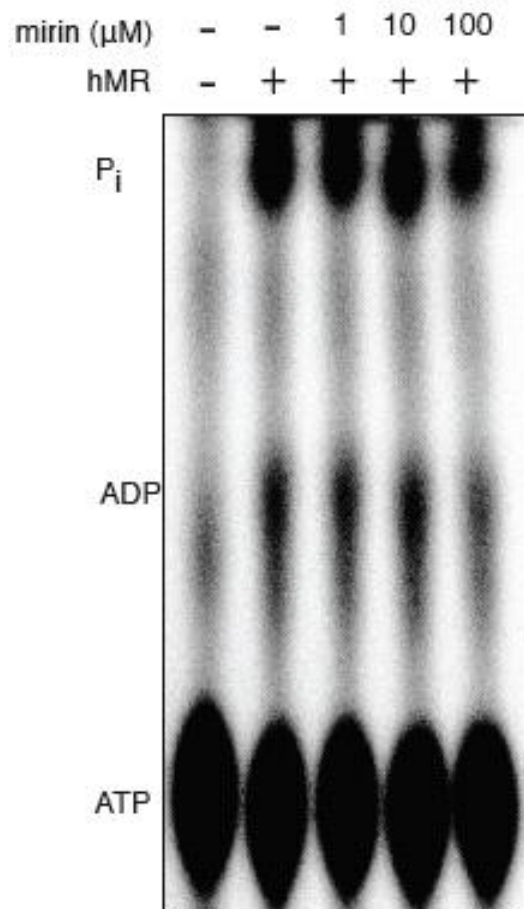

**Supplementary Figure 6.** Mirin does not inhibit Exonuclease III nuclease activity

Mirin in DMSO  
NEB ExoIII

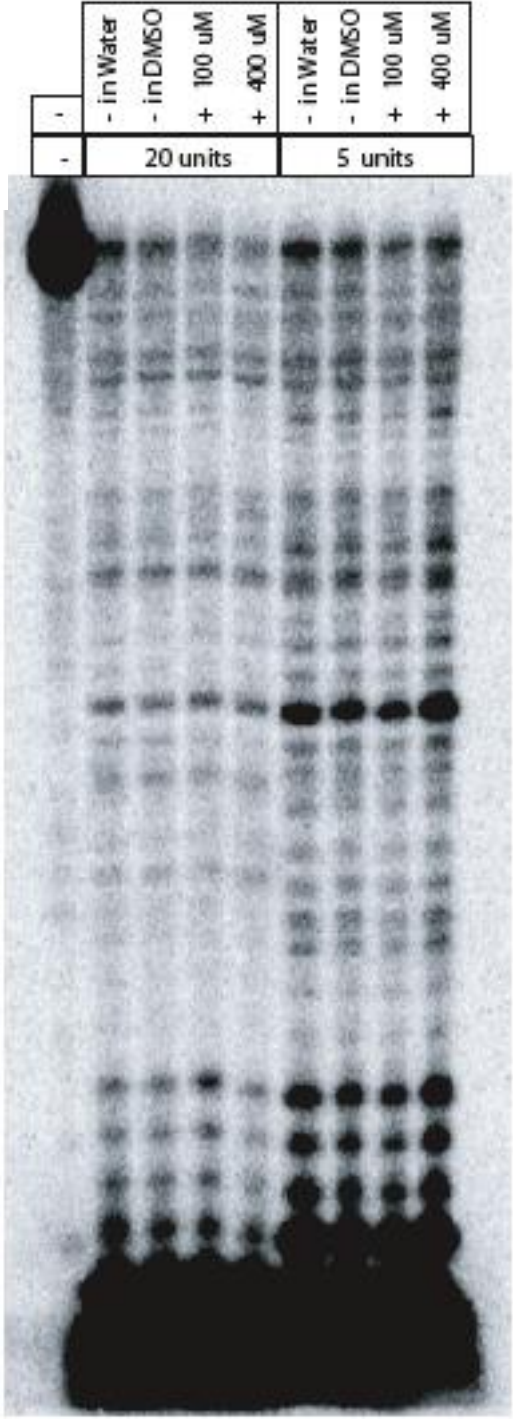



**Supplementary Figure 7.** Effects of Mirin and KU-55933 on G2/M transition. U2OS cells were plated and allowed to attach overnight. Cells were then treated with the indicated concentrations of Mirin and/or KU-55933. After 24 h incubation, cells were harvested, fixed with 70% ethanol, and stained with propidium iodide for cell cycle analysis by FACS. .

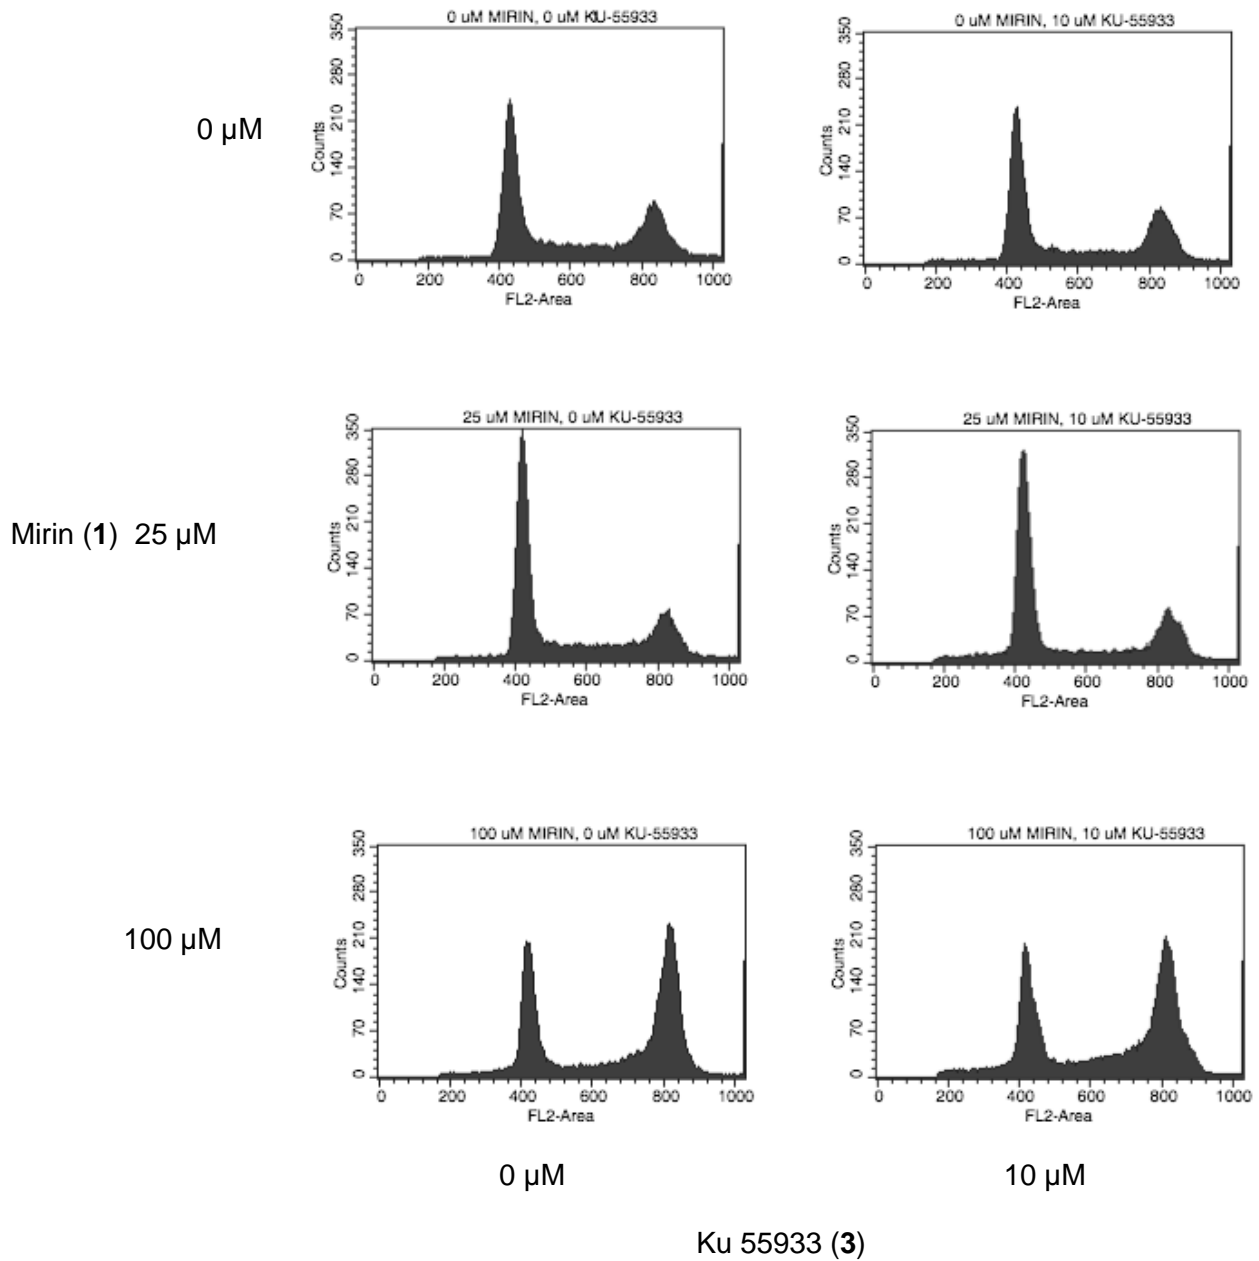

**Supplementary Figure 8.** Time course of U2OS cells after release from double thymidine block.

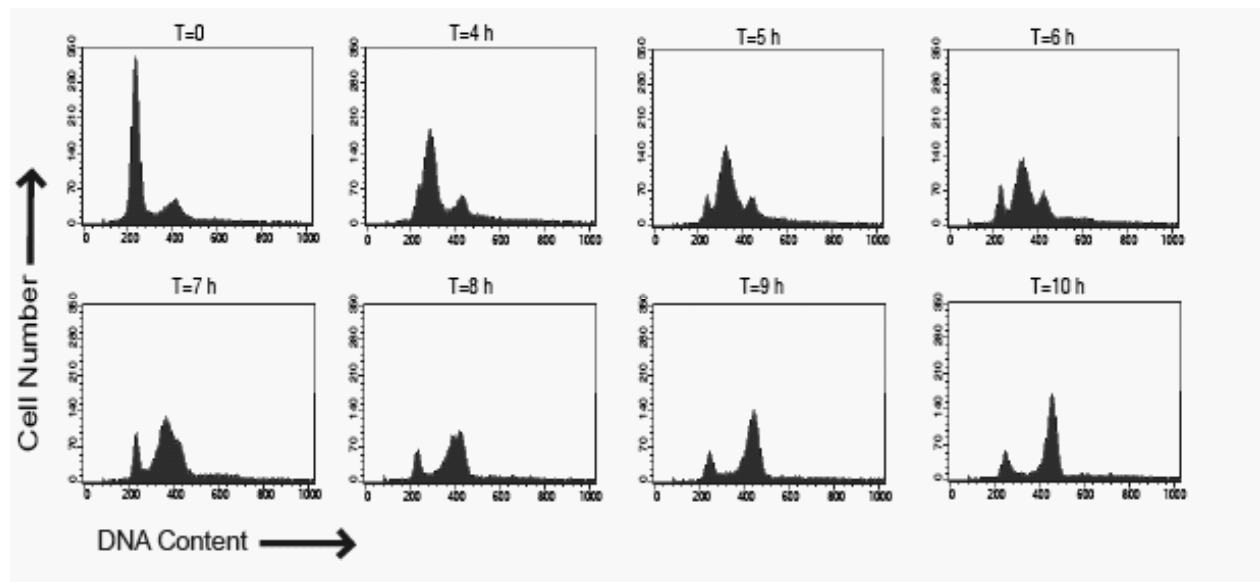

**Supplementary Figure 9.** Scheme of Gene Conversion Repair assay

In this assay, HEK293-derived, TOSA4 cells harbor a single chromosomally-integrated copy of the DR-GFP reporter substrate. The DR-GFP reporter harbors two non-functional copies of the GFP gene, one (*SceGFP*) that is disrupted by the recognition site for the rare-cutting endonuclease *I-SceI* and another (*iGFP*) that only encodes an internal region of the GFP polypeptide. Expression of *I-SceI* in TOSA4 cells results in a chromosomal DSB at the *I-SceI* site of *SceGFP*, and repair of the induced DSB by gene conversion with *iGFP* yields cells expressing a functional *GFP*<sup>+</sup> gene that can be scored by flow cytometry.

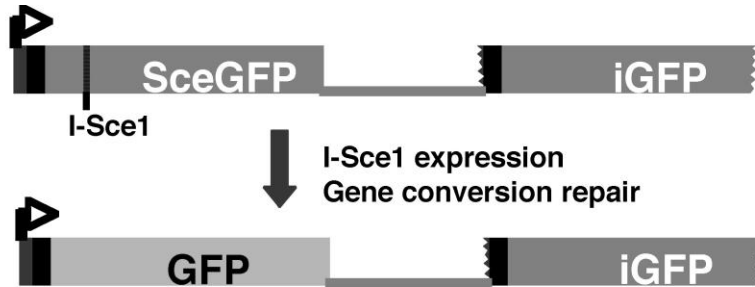

## **Supplementary Methods**

### Preparation of U2OS cell lysates

U2OS cells were synchronized in G1/S using double thymidine block (see below). Thirty min after addition of Thymidine, cells were mock-treated or irradiated (10 Gy) from a Cesium-137 source in presence of 2 mM thymidine to maintain cells at G1/S border. Thirty min later, cells were harvested and washed twice with cold 1× PBS. Cell pellets were resuspended in lysis buffer (50 mM Tris, pH 7.6, 100 mM NaCl, 1% SDS, 5 mM DTT, 1X protease inhibitor cocktail (Sigma)). Lysates were heated 5 min at 95°C, protein quantified by Bradford Assay and the equivalent of 30 µg protein was loaded onto 3-8% NuPage Tris-Acetate gel (Invitrogen), followed by Western Blot analysis with the indicated antibodies. The chemiluminescent signal was quantified using densitometer and ImageQuant software.

### Production and purification of recombinant FLAG MRN complex

Human FLAG-MRN complex was expressed from pTP11 (Mre11), pTP17 (Rad50) and pTP38 (FLAG-Nbs1) baculovirus constructs in SF9 insect cells as previously described in<sup>31</sup>. Proteins were eluted from M2-FLAG agarose resin (Sigma) with 20 mM Tris-HCl (pH 8), 100 mM NaCl, 1 mM EDTA, 0.1 % Triton X-100, 0.1% IGEPAL supplemented with 0.1mg ml<sup>-1</sup> FLAG peptide (Sigma) and dialyzed against ELB buffer.

### Immunodepletions and antibodies

For *Xenopus* experiments, Mre11, Nbs1 and ATM antibodies have been described elsewhere<sup>9</sup>. Chk2 antibody was a kind gift of Dr. H. Lindsay (Lancaster University). For immunodepletions, extracts were incubated three times with protein A–Sepharose beads (GE Healthcare) coupled to anti-XMre11 serum (ratio of extract/beads/serum = 1:1:1) or preimmune-serum previously diluted in PBS (Mock depletion).

For mammalian cells, antibodies directed against the phosphorylated form of ATM and total ATM were purchased from Rockland Immunochemicals, Inc. HRP-conjugated secondary antibodies were from Jackson ImmunoResearch Laboratories.

### Biotinylated DNA pull-down experiments

Non-biotinylated and biotinylated 150bp DNA fragments were generated by PCR using M13 single stranded DNA template and *Pfu* polymerase as previously described<sup>10</sup>. Non-biotinylated radioactive DNA was also produced by PCR in the presence of  $\alpha$ -<sup>32</sup>P-dCTP. Unincorporated nucleotides were removed using Qiagen purification kit. Biotinylated DNA was coupled to streptavidin-coated magnetic beads (M-280, Dynal Biotech) as described<sup>10</sup>. Beads were washed six times with ELB buffer (10mM HEPES, pH 7.7; 2.5mM MgCl<sub>2</sub>; 0.05mM KCl and 250mM Sucrose) and then incubated with extracts for 10 min at a final concentration of  $1.2 \times 10^{11}$  or  $3.6 \times 10^{11}$  ends  $\mu\text{l}^{-1}$ . DNA and extracts were then separated according to the manufacturer's instructions. DNA was washed six times with ELB supplemented with 0.1% (v/v) Triton X-100. Proteins were then analyzed by Western blot in both soluble fractions and DNA fractions using NuPage 3-8% Tris-acetate SDS polyacrylamide gels (Invitrogen).

For extract fractionation, 50  $\mu\text{l}$  of extracts were loaded on a Superose 6 gel-filtration column and 1 ml fractions were collected. 200  $\mu\text{l}$  of each fraction was then precipitated with trichloroacetic acid and analyzed on a 6% SDS-PAGE gel by Western blot using an antibody directed against Mre11.

For FLAG pull down experiment, 5  $\mu\text{l}$  of WT FLAG-MRN was added for 15 min to extracts, in the presence DMSO or Mirin. Recombinant complexes were then isolated with 5  $\mu\text{l}$  of M2-FLAG resin. Resulting supernatants (1  $\mu\text{l}$ ) and beads (5  $\mu\text{l}$ ) were loaded on an 8% SDS page and immunoblotted using an antibody against FLAG, Mre11 or Rad50.

For DNA tethering assays, streptavidin-bound biotinylated DNA and non-biotinylated radioactive DNA were incubated in extracts for 30 min. Biotinylated DNA was then pulled down, washed six times with ELB buffer supplemented with 0.1% (v/v) Triton X-100, and the radioactivity associated with biotinylated DNA counted by scintillation.

### Cytotoxicity assay

HEK293 cells were grown in DMEM with 10% fetal bovine serum and 1% penicillin-streptomycin at 37°C in 5% CO<sub>2</sub>. HEK293 cells were plated at approximately 500 cells per 100 mm plate and allowed to attach overnight (Day 0). On the following day, media was removed and 8 ml of fresh media supplemented with the appropriate concentration (0 μM, 10 μM, 25 μM, 50 μM, 100 μM) of Mirin was added to each plate (Day 1). Duplicate plates were set up for each dose. Cells were incubated with the compound for 24 h at 37°C and 5% CO<sub>2</sub>, after which media was aspirated and fresh, compound-free media was applied. Fresh media was applied every 3 days until Day 10. On Day 10 cells were fixed with 100% methanol and stained with 10% Giemsa for colony counting. Percentage survival is expressed as the average number of colonies on treated plate divided by average number of colonies on control plate (0 μM of Mirin).
